# Supplementary material
Source: PubMed Central journal article supplement (PMC3446616)
Supplement: JVI.01271-12_zjv999096544so1.pdf [file JVI.01271-12_zjv999096544so1.pdf]

TABLE S1 Primers used for RT-PCR analysis of splice junctions

| Expt <sup>a</sup> | ORF     | Splice sites <sup>b</sup> | Primer location (5'-3')        | Primer sequence (5'-3')                        |
|-------------------|---------|---------------------------|--------------------------------|------------------------------------------------|
| 01                | ORF1    | D-1938<br>A-1810          | 2037-2018<br>1711-1730         | ATGTGGACAGTGATCCAGTG<br>GGTCCACCACGGAGCGATGA   |
| 02                | ORF1    | D-3138<br>A-2852          | 3237-3218<br>2753-2772         | CCACAGAACGCCCGTTACCC<br>TGGAATCCACCAGTCCGCAA   |
| 03                | ORF10   | D-14481<br>A-12487        | 14560-14541<br>12368-12387     | AAACCAACAAAATCGGCAAA<br>GAGCATCTCTCGCTCGGAAG   |
| 04                | ORF10   | D-15971<br>A-14866        | 16070-16051<br>14767-14786     | TCAGCCATAGGCATTTGCAC<br>TTCGTTTCAACCAAAAAAGT   |
| 05                | ORF10   | D-16289<br>A-16187        | 16388-16369<br>16088-16107     | AGTGGAGTCGTTGATGAACC<br>ATGTGGGATCCATTCCGATC   |
| 06                | ORF10   | D-26117<br>A-16702        | 26216-26197<br>16603-16622     | GTGACGGTAGCTTATCGAGG<br>CTTTCACAGTCATCAGAGGC   |
| 07                | ORF19   | D+26343<br>A+27106        | 26244-26263<br>27205-27186     | CGGCCAGTCACCAACATTCT<br>GGTCTTCATCAGGTCCACCG   |
| 08                | ORF19   | D+26544<br>A+27106        | 26445-26464<br>27205-27186     | TTACAGTTTCGCAAAAAATGG<br>GGTCTTCATCAGGTCCACCG  |
| 09                | ORF25   | D+37903<br>A+38024        | 37804-37823<br>38123-38104     | CTCGCTTCCACGAGCTCCAG<br>CTTCGTACCGTCTTCGTAG    |
| 10                | ORF29   | D-44470<br>A-43244        | 44569-44550<br>43145-43164     | TCTGAGAGTTTGTGCGGCTT<br>GAGGACCTCTGAAATCGCGC   |
| 11                | ORF29   | D-46317<br>A-43244        | 46416-46397<br>43145-43164     | CCTATTGCATTGCCGATCAG<br>GAGGACCTCTGAAATCGCGC   |
| 12                | ORF52   | D+80715<br>A+82795        | 80616-80635<br>82894-82875     | TTGTTCGGAGGAAGAGTTCC<br>AAAAAGATCTTGTGTAGCGT   |
| 13                | ORF52   | D+81069<br>A+82795        | 80970-80989<br>82894-82875     | ACGGCAGAACACGTTTCGCAA<br>AAAAAGATCTTGTGTAGCGT  |
| 14                | ORF52   | D+81947<br>A+82795        | 81848-81867<br>82894-82875     | TCGTTTTCGTCGTTTTTATTT<br>AAAAAGATCTTGTGTAGCGT  |
| 15                | ORF52   | D+81958<br>A+82795        | 81931-81950<br>82966-82947     | ACTGATGCTTTCGAAGGGTG<br>GTTGGTTGCTGAGAGGGGTC   |
| 16                | ORF51   | D-83104<br>A-82797        | 83203-83184<br>82698-82717     | TTTCCTTTCAACACGTCTGA<br>CTTTTGGTCGCCTCCACCAC   |
| 17                | ORF51   | D-83109<br>A-82797        | 83208-83189<br>82698-82717     | TTGAGTTTCTTTCAACACG<br>CTTTTGGTCGCCTCCACCAC    |
| 18                | ORF52   | D+83811<br>A+84163        | 83712-83731<br>84262-84243     | GATCTCTTGGACAAGCTCCC<br>CCTTTTCATCAGTTTGTGTC   |
| 19                | ORF59   | D+93589<br>A+94994        | 93490-93509<br>95093-95074     | TGTCTTCTGTGAAAGCGGCA<br>AAACCGAGGCCGTGTAGACA   |
| 21                | ORF71   | D-111311<br>A-111234      | 111410-111391<br>111135-111154 | GAAC TGACTCTCACA AATTT<br>ACGGCCGTTGTTGCATTGGC |
| 22                | ORF71   | D-111668<br>A-111583      | 111767-111748<br>111484-111503 | GAGCAGTTGTTGCGGTTTCC<br>TTGTTCGTCGCCGTTTCCA    |
| 23                | ORF83   | D+125696<br>A+125868      | 125597-125616<br>125967-125948 | GCTGTAGCTGAAGACAGATT<br>ACGGGATCGTACGCCGTGTC   |
| 24                | ORF89as | D+147741<br>A+147891      | 147642-147661<br>147990-147971 | GGCGGAGGGACTGTTTTCGAG<br>TTCCCCAGAATGATATCACG  |
| 25                | ORF91   | D+148213<br>A+149478      | 148114-148133<br>149577-149558 | TCGGATTGTCCCAATCCTCG<br>GCAATCCCTAAGCAAGTTCCG  |

|    |        |                      |                                |                                               |
|----|--------|----------------------|--------------------------------|-----------------------------------------------|
| 26 | ORF90  | D-149349<br>A-149249 | 149448-149429<br>149150-149169 | GTTGATCAAACCTGACGGCG<br>GGGCCATAACGGGCCCGCTC  |
| 27 | ORF100 | D-171325<br>A-169861 | 171424-171405<br>169762-169781 | CTTTGGCCTCCATCACCAAC<br>CATTATGTCTGTTGCTGTGAA |
| 28 | ORF100 | D-172973<br>A-172163 | 173072-173053<br>172064-172083 | GGCCGACAAAGATCATTTAA<br>TCACCAACGCTTTGTTGATC  |
| 29 | ORF100 | D-173459<br>A-173267 | 173558-173539<br>173168-173187 | CTGTAGCGCAACTTGC GCGG<br>AAACTGGTGCGCGATGGATT |
| 30 | ORF112 | D+199826<br>A+200193 | 199707-199726<br>200272-200253 | GTGTTGTTGCTCTTGT TTTG<br>TAGAACGGGGTTGATAATGA |
| 31 | ORF112 | D+200109<br>A+200193 | 200010-200029<br>200292-200273 | CTTTATAAAGCGGCGTATGC<br>GCCTTGGTTGGAGGGACTAA  |
| 32 | ORF127 | D-222245<br>A-222143 | 222344-222325<br>222044-222063 | TTCTCACAGCGGCTCCTCCA<br>GTTTGGTGGTGCAGACACGT  |
| 33 | ORF127 | D-223119<br>A-222990 | 223218-223199<br>222891-222910 | AGGCGGTCTGATTCGGGGCG<br>AACTGTCCGGTTTTTTCAAG  |
| 34 | ORF131 | D-228091<br>A-227970 | 228190-228171<br>227871-227890 | TTAGGGCAACTATTGTCCAA<br>CGCCATGAATTCAGCAGATG  |
| 35 | ORF131 | D-228535<br>A-228420 | 228634-228615<br>228321-228340 | GGCGCAGGAGTCCCAGTCCA<br>AACTGGGAGCGCCGGAACGG  |
| 36 | ORF134 | D+234296<br>A+234913 | 234197-234216<br>235012-234993 | TGGTCCGAATCGAGATGCAA<br>ATCTGCGTCACTGCGGTCGT  |
| 37 | ORF134 | D+235104<br>A+235251 | 235005-235024<br>235350-235331 | ACGCAGATTGCGAGGGTGGG<br>CAACAGAAGGCCCGAATGGC  |

<sup>a</sup> These numbers correspond to the lane numbers in Fig. 2. Expt 20 is omitted because it failed with all primers.

<sup>b</sup> D, donor site; A, acceptor site; +, rightward transcription; -, leftward transcription.

TABLE S2 Primers used for RACE

| Expt <sup>a</sup>            | ORF                              | Primer location (5'-3') <sup>b</sup> | Primer sequence (5'-3')                            | Products analyzed (bp) <sup>c</sup> |
|------------------------------|----------------------------------|--------------------------------------|----------------------------------------------------|-------------------------------------|
| <i>5'-ends, SMARTer RACE</i> |                                  |                                      |                                                    |                                     |
| 01                           | ORF18                            | 25947-25970<br>25989-26008           | GTGAAGAGGTCCCGGTTTCGTTACA<br>GGTGCTGAAAGCGCCTTGT   | 400                                 |
| 02                           | ORF19                            | 27379-27356<br>27354-26335           | TAGTGGCCGTGGTGGCTGCACTCA<br>AACACTTGC AACGTCGTCAG  | 400                                 |
| 03                           | ORF19                            | 27379-27356<br>26520-26501           | TAGTGGCCGTGGTGGCTGCACTCA<br>CGAAGTTGCGAACGGAATAC   | 150-450                             |
| 04                           | ORF25                            | 38282-38259<br>38255-38236           | CGAGCGCGACTTGTAGCGTGTCTCGA<br>ACAGCAAGTCGGCACCTTCC | 350                                 |
| 05                           | ORF29                            | 42990-43013<br>43025-43044           | TGGGTCCGTGAGTCTTGACAGCCGT<br>CCCTCAGCGTCACCTTAGGT  | 450-650                             |
| 06                           | ORF43                            | 68795-68818<br>68856-68875           | ACGGCACAGATGATGTCTGCCAGA<br>AACGTGTTTCGTAGGCCACTC  | 300                                 |
| 07                           | ORF51                            | 82578-82601<br>82602-82620           | ATAGCGAGGGCCGTCAGGTCCGCA<br>ATTTTGAGAATCGGCATAGA   | 300-450                             |
| 08                           | ORF51                            | 82578-82601<br>82722-82741           | ATAGCGAGGGCCGTCAGGTCCGCA<br>GAGAGCATTTGTCCGCTGCAT  | 150-300                             |
| 09                           | ORF52                            | 83056-83033<br>82935-82916           | GAGACACCGGGCGTCTTGATGCAT<br>TGACCGTGACCCGAGTCTTG   | 300-650                             |
| 10                           | ORF59                            | 95166-95143<br>95138-95119           | TGCGCTTCGCACAGTGGACACAGT<br>TCAGTGGATCCGCAACATCC   | 250                                 |
| 11                           | ORF89 <sup>as</sup> <sup>d</sup> | 147388-147365<br>147358-147339       | GCAATCGACCAGCCTACCATCACT<br>ATTC AATACGTTACGCCAGA  | 400                                 |
| 12                           | ORF97                            | 161911-161934<br>161964-161983       | CGGTGCCCTGTCTGTTGACATTGT<br>AGTCTGTCTTCCAGCAGCTG   | 300-450                             |
| 13                           | ORF100                           | 172973-172996<br>173004-173023       | CTTGCTGTAATGATTTCCGGGTCC<br>ATCGGATCAGTCCTTTCCAT   | 300-600                             |
| 14                           | ORF105                           | 177863-177840<br>177752-177733       | CAGTTTTCGCTCTCAGGACCCGGAT<br>CTTGACCGCGACGTGCCCTCT | 300                                 |
| 15                           | ORF106                           | 182530-182553<br>182628-182647       | GTAGTTGTGTCAGGTTGATCAGGTT<br>CTGCGTTTCGAGCGAAGAGTG | 200-700                             |
| 16                           | ORF115                           | 203170-203147<br>203129-203110       | GCGCCGATCAAGGCAGCTGCGACA<br>CAGACAGTCGTTGACACAAC   | 200                                 |
| 17                           | ORF126                           | 220544-220521<br>220479-220460       | AGGGACTCGGCTGCACGCTTGCGT<br>ACTCGTCCGAGCCGAAGCTG   | 350                                 |
| <i>3'-ends, SMARTer RACE</i> |                                  |                                      |                                                    |                                     |
| 18                           | ORF25                            | 38333-38356                          | CCACCGTTTCTCTATGCGCGACTAC                          | 250                                 |
| 19                           | ORF42                            | 68293-68316                          | CGCGGTCAACTGGCCAACATAGTC                           | 250                                 |
| 20                           | ORF43                            | 68640-68617                          | GGGCGACCAATCTGCGCTGATCAG                           | 250                                 |
| 21                           | ORF59                            | 95375-95398                          | AAAACCATGGTGCGCCAAATGGTC                           | 350                                 |
| 22                           | ORF126                           | 220801-220824                        | CTGATCAACGCGGTCTCTGATCTG                           | 350                                 |
| 23                           | ORF131                           | 227334-227311                        | TTCCCCAAATGCTCCAGACAGAG                            | 350                                 |
| <i>5'-ends, ExactSTART</i>   |                                  |                                      |                                                    |                                     |
| 24                           | ORF25                            | 38303-38284                          | CCAACAGTCCCTTACGTTT                                | 400                                 |
| 25                           | ORF43                            | 68765-68784                          | CATCAGCCAGTTTGACAACG                               | 250                                 |
| 26                           | ORF100                           | 173156-173175                        | CACACCCAGGAGAAACTGGT                               | 250                                 |
| 27                           | ORF126                           | 220688-220669                        | AGAATGGTGGCGTCTTTTAC                               | 550                                 |
| <i>3'-ends, ExactSTART</i>   |                                  |                                      |                                                    |                                     |

|    |        |               |                      |     |
|----|--------|---------------|----------------------|-----|
| 28 | ORF25  | 37989-38008   | TCGTCTTGCTGTGTCTGGTC | 600 |
| 29 | ORF42  | 68160-68179   | ATGGCACAAGGTGTTTCACA | 400 |
| 30 | ORF43  | 68957-68938   | TGCGTCACTTTACCATCTGC | 550 |
| 31 | ORF59  | 95185-95204   | GCCTGAAAGACAGGTCGAAG | 500 |
| 32 | ORF126 | 220344-220363 | GCAGCAGGTTCAAGTTCCTC | 800 |

---

<sup>a</sup> These numbers correspond to the lane numbers in Fig. 3.

<sup>b</sup> Where two primers are listed, they were used in first- and second-round (nested) PCR, respectively.

<sup>c</sup> Bands within ranges may have been excised singly or in groups.

<sup>d</sup> Antisense to ORF89 and ORF90.
